# Supplementary material
Source: MDPI journal article supplement (https://www.mdpi.com/2073-4441/13/9/1267)
Supplement: s1 [file s1 › water-1150920-supplementary.pdf]

# Roadmap for Determining Natural Background Levels of Trace Metals in Groundwater

Denitza D. Voutchkova\*, Vibeke Ernstsén, Jörg Schullehner, Klaus Hinsby, Lærke Thorling, and Birgitte Hansen

\* Correspondence: [dv@geus.dk](mailto:dv@geus.dk)

## Contents

|                                                                             |    |
|-----------------------------------------------------------------------------|----|
| Supplementary text.....                                                     | 1  |
| NBL derivation part of MP2 (River Basin Management Plan 2015-2021) [1]..... | 1  |
| Summary of pre-selection criteria, the BRIDGE method [3] .....              | 1  |
| Study setting (additional details).....                                     | 1  |
| Supplementary figures.....                                                  | 2  |
| Supplementary tables.....                                                   | 6  |
| References .....                                                            | 10 |

## Supplementary text

### *NBL derivation part of MP2 (River Basin Management Plan 2015-2021) [1]*

The chemical data was from the nationwide database Jupiter [2], where almost all laboratory analyses of groundwater are registered and accessible. Both the geology and location of the aquifers were considered. NBLs were calculated for each layer of the National Water Resources Model for Denmark (DK-model, <https://vandmodel.dk/>) and for ten geographical areas comprising the main river basins. The DK-model layers provided information on the type and depth sequence of the aquifers. The redox conditions of the aquifers were also considered, based on groundwater NO<sub>3</sub> concentration: oxic if NO<sub>3</sub> ≥ 1 mg/l and anoxic if NO<sub>3</sub> < 1 mg/l. Sampling points affected by known point-sources of anthropogenic pollution were excluded from the dataset prior to any analysis. The NBLs were established only for geological units with at least 10 sampling points with data, while the redox-dependent NBLs were calculated if there were more than 20 sampling points with data.

### *Summary of pre-selection criteria, the BRIDGE method [3]*

The NBLs in this method are calculated as the 90<sup>th</sup> (or 97.7<sup>th</sup>) percentiles of a pre-selected dataset, to approximating the aquifer's natural groundwater composition. These criteria [3] are:

- Excluding samples with incorrect ion balance (> 10%), and/or unknown sampling depth, and/or unknown type of aquifer (lithology)
- Excluding brackish and saline waters, i.e. if [Na<sup>+</sup>] + [Cl<sup>-</sup>] > 1000 mg/l
- Aggregation of time-series at sampling point level is based on median
- Sampling points with median NO<sub>3</sub> > 10 mg/l are excluded (considered polluted)
- If there are both aerobic and anaerobic conditions, the NBLs should be computed for the two separately.
- For anaerobic conditions NO<sub>3</sub> cannot be used as pollution indicator, thus other indicators should be defined based on sound understanding of the local conditions.

### *Study setting (additional details)*

Denmark is situated in Northern Europe – bordering Germany to the South, the Baltic Sea to the East, and the North Sea to the West. Denmark's climate is relatively warm compared with other areas at the same latitude (54.5–57.8°N) due to the North Atlantic Current. It is dominated by a warm humid continental or oceanic climate. The weather is strongly influenced by the proximity to both the sea and the European continent and varies depending on dominant wind direction and season. The country-wide annual average temperature and rainfall were respectively 8.3 °C and 746 mm (climatological normal 1981-2010) and 8.9 °C and 792 mm (2006-2015)<sup>1</sup>.

The landscape (Figure S1) is dominated by Weischelian moraines (till) in the eastern part of the county. The main stationary line of the Scandinavian Ice Cap forms a boundary west of which lies a meltwater plain and moraine remnants from the Saalian glaciation. The Pleistocene glaciogenic sediments are composed of glacial till and fluvio-glacial outwash material that interfinger with each other and are occasionally interbedded with interglacial or interstadial deposits [4].

Another widespread feature are the buried tunnel valleys (Figure S1). These are elongated erosional structures filled with and covered by younger sediments, which have typically very complex internal structure because of repeated erosional and depositional events [5]. Most of the buried valleys in the Danish subsurface were formed during the Pleistocene as tunnel valleys eroded by high-pressure meltwater underneath the ice sheets, typically following older geological depressions or faults [5].

The pre-Quaternary geology of Denmark (Figure S1) is tilted to the southwest with deposits getting older in northeastern direction [4]. The oldest sediments in northeastern Denmark are dominated by Maastrichtian chalk and Danian limestone, except for Bornholm, where older deposits can be found. The pre-Quaternary surface progresses southwest through different types of clayey deposits from the Paleocene, Eocene, Oligocene, and Miocene. The major faults locations are also shown in Figure S1.

## Supplementary figures

---

<sup>1</sup> The climate and weather information is from the site of the Danish Meteorological Institute (DMI), accessed on 15 Oct 2020: <https://www.dmi.dk/klima/temaforside-klimate-frem-til-i-dag/>

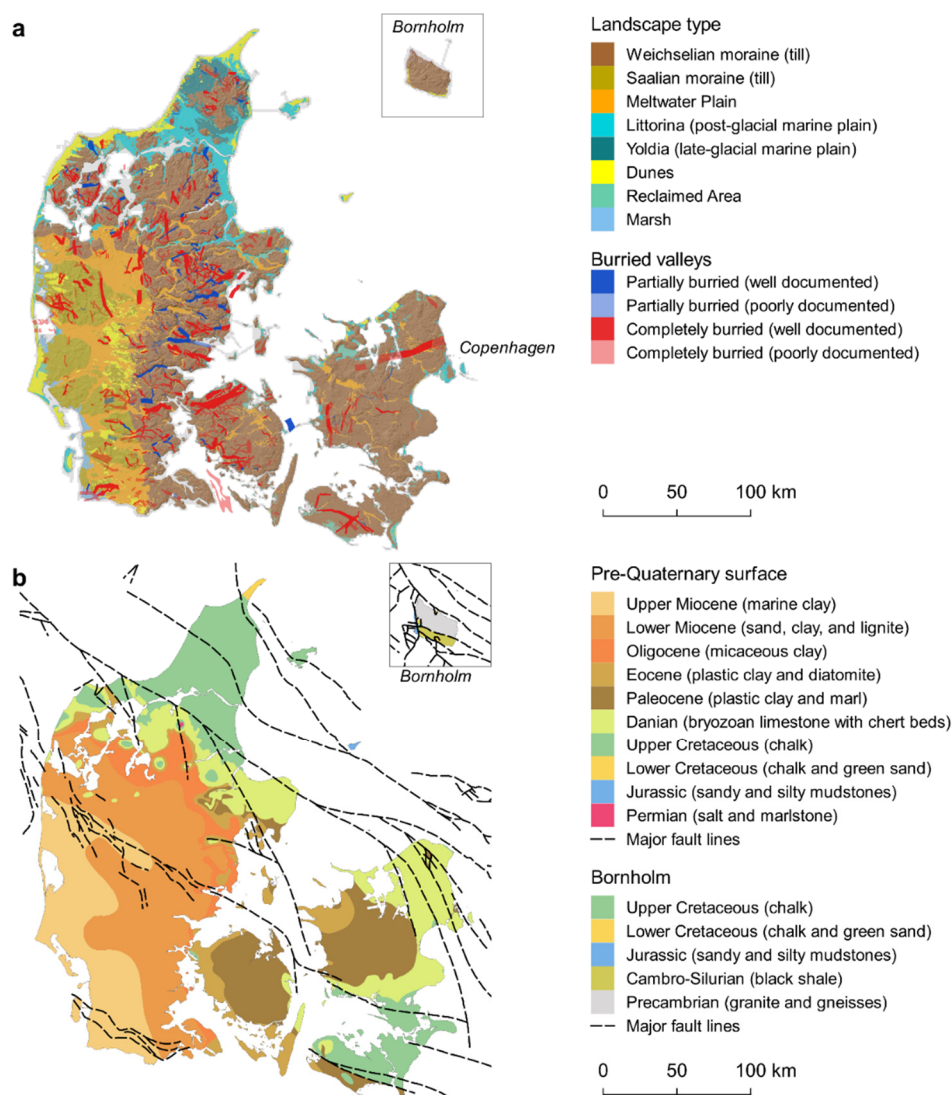

**Figure 1.** (a) Danish landscape types<sup>2</sup> with a hill shade effect<sup>3</sup> and location of the mapped buried valleys [5], (b) Pre-quaternary stratigraphic succession underlying the Quaternary sedimentary deposits and the major faults<sup>4</sup>.

<sup>2</sup> Vector layer from the Danish Centre for Food and Agriculture (DCA) <https://dca.au.dk/forskning/den-danske-jordklassificering/>

<sup>3</sup> Transparent hillshade layer “DHM Terrain skyggekort over drejet” from The Danish Map Supply (dk: “Kortforsyningen”)

<sup>4</sup> The map is “Geologisk kort over den Danske underground” published by Varv in 1992 and described in VARV nr. 2, 1992, downloaded from <https://frisbee.geus.dk/geuswebshop/index.xhtml> (accessed on 5 Nov 2019)

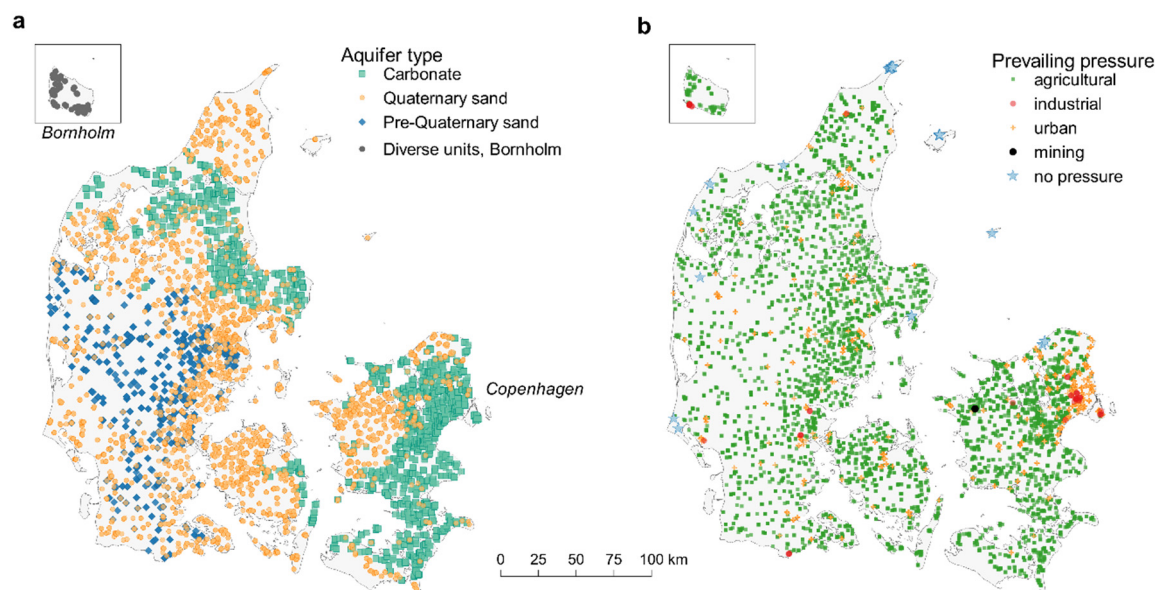

**Figure 2.** Classification of the sampling points based on aquifer type (a) and prevailing pressure (b).

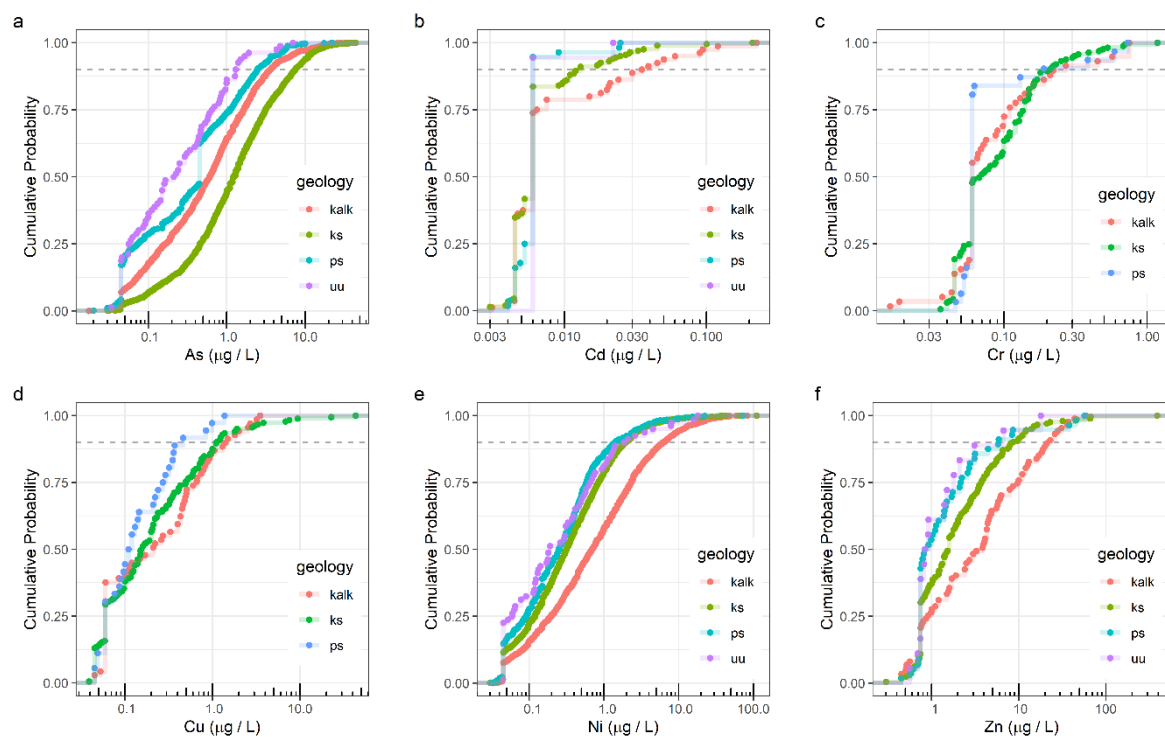

**Figure 3.** Empirical cumulative distribution function for As, Cd, Cr, Cu, Ni, and Zn in Danish groundwater used for drinking water production, stratified by aquifer type: limestone/chalk ("kalk"), Quaternary sand ("ks"), pre-Quaternary sand ("ps"), various units on Bornholm ("uu").

HOVER\_pH ● Acidic (pH < 7) ● Basic (pH > 7.5) ● Neutral (7 ≤ pH ≤ 7.5)

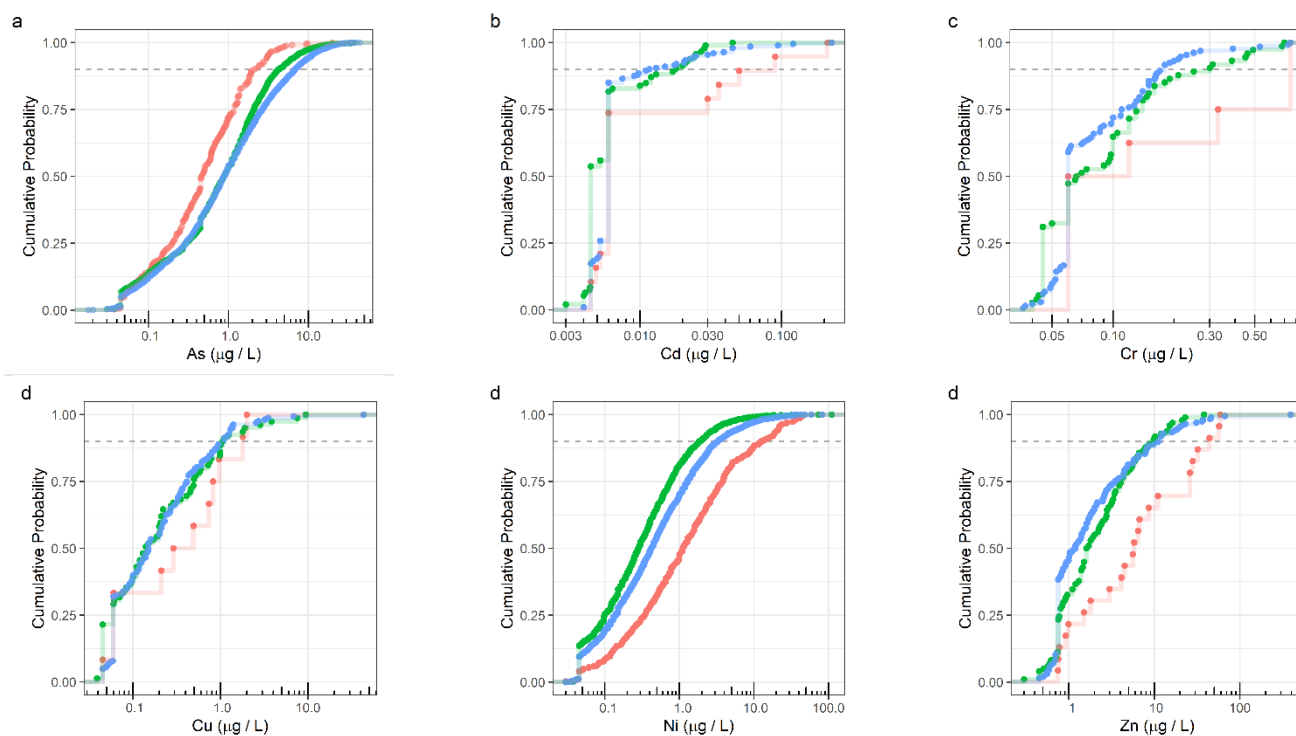

**Figure S4.** Empirical cumulative distribution function for As, Cd, Cr, Cu, Ni, and Zn in Danish groundwater at waterworks wells used for drinking water production, stratified by pH class.

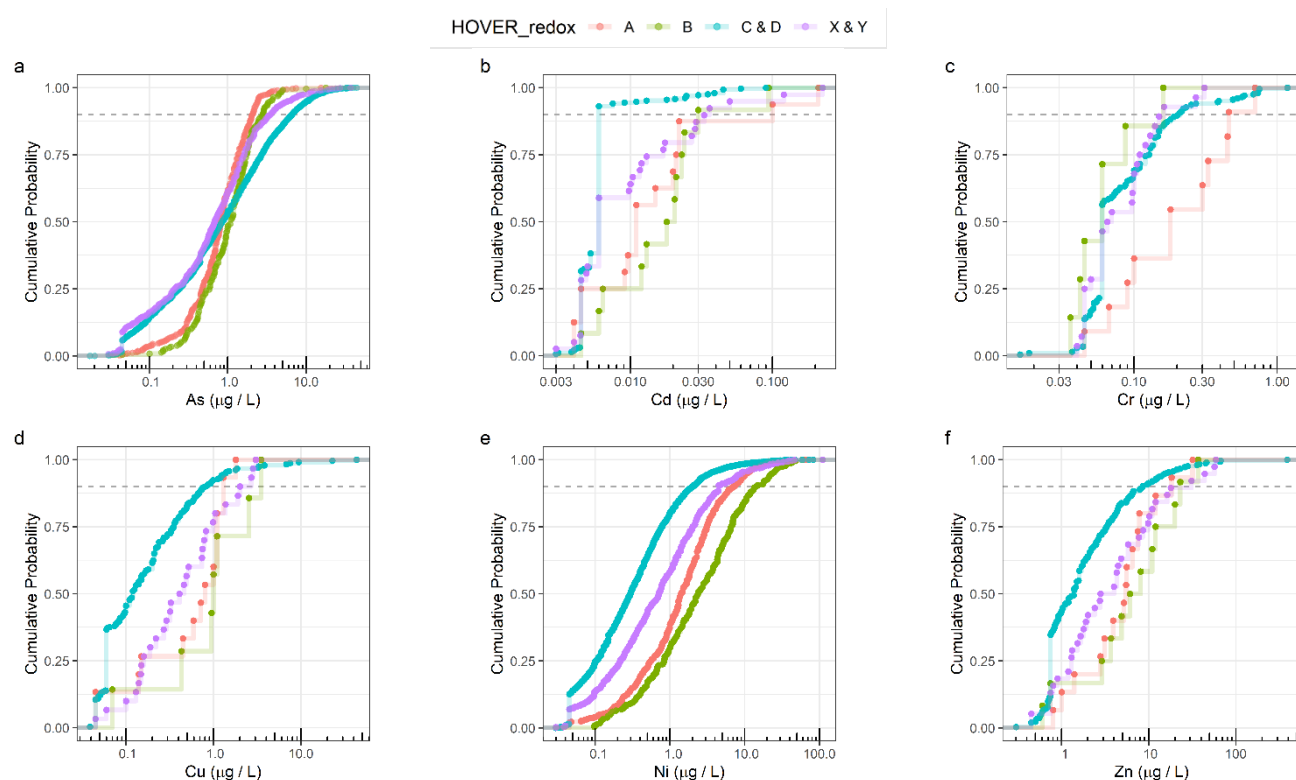

**Figure 5.** Empirical cumulative distribution function for As, Cd, Cr, Cu, Ni, and Zn in Danish groundwater at waterworks wells for drinking water production, stratified by redox class.

prevailing — agricultural — industrial — urban

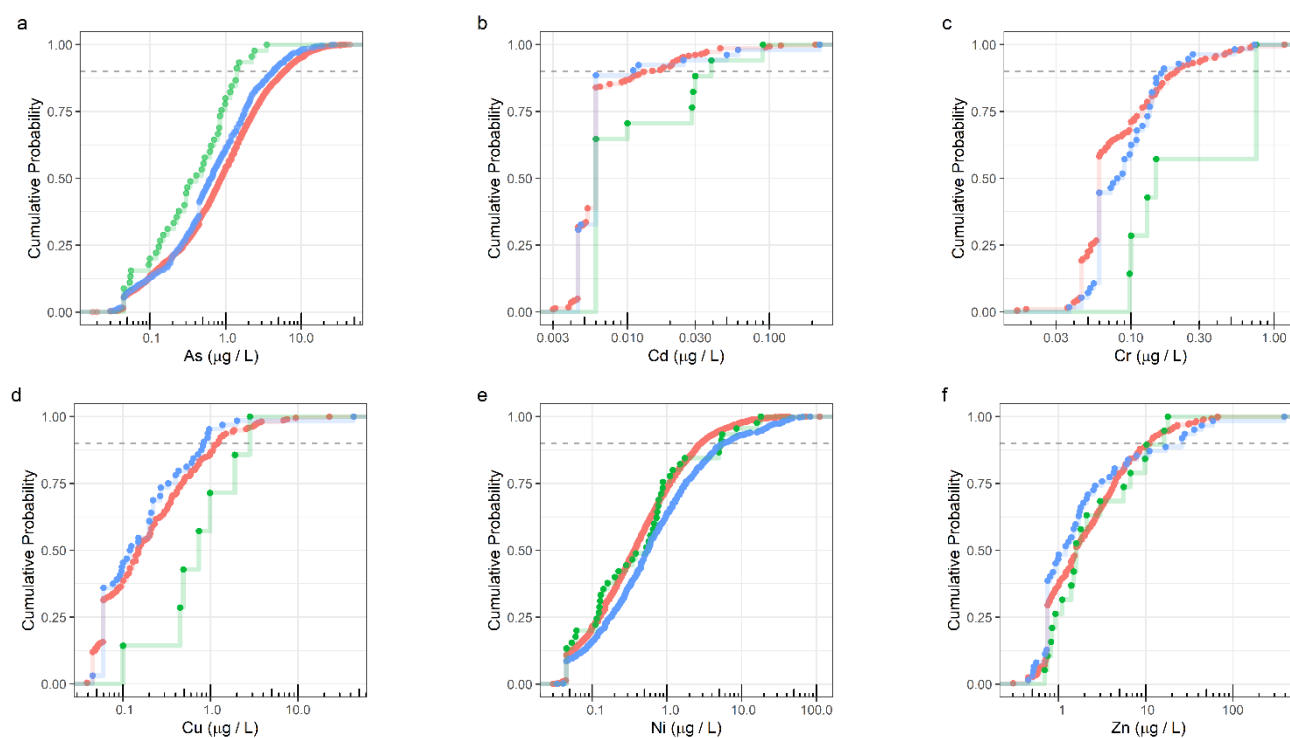

**Figure 6.** Empirical cumulative distribution function for As, Cd, Cr, Cu, Ni, and Zn stratified by prevailing anthropogenic pressure (“mining” and “natural” were excluded due to too few water sampling points).

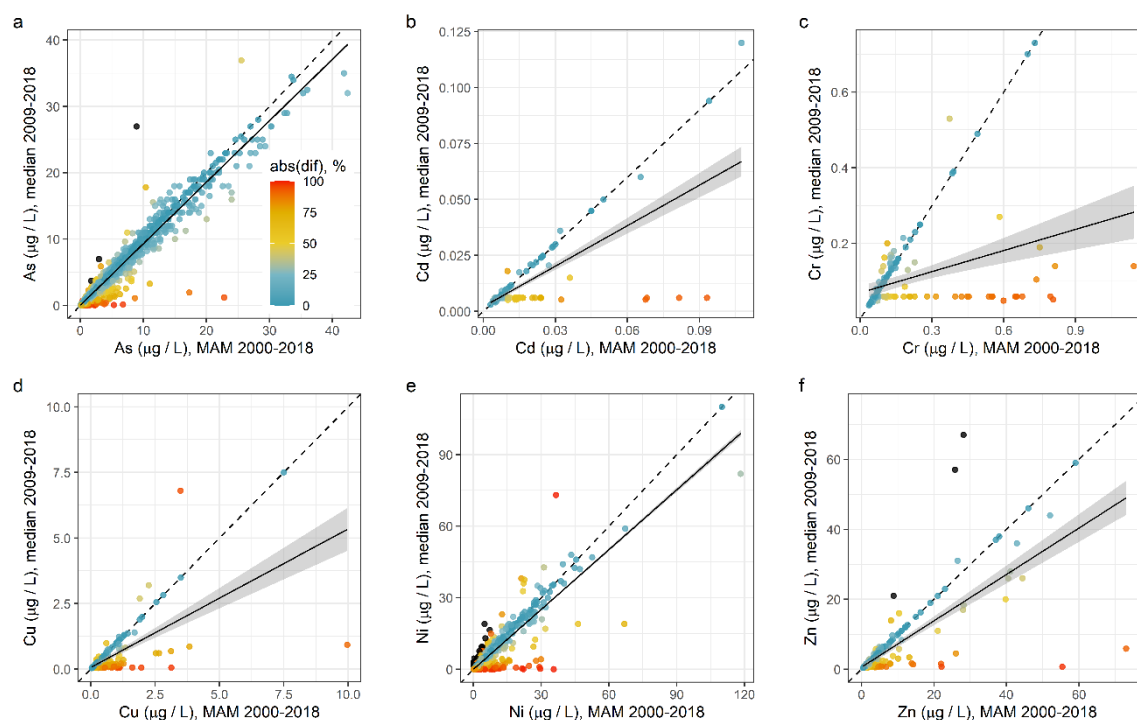

**Figure 7.** Comparison between the aggregated datasets for *HOVER basis* and *MP3 basis* including the sampling points present in both datasets; MAM stands for mean computed from the annual means; abs(dif) stands for the absolute difference between the median and MAM in % calculated with the formula:  $\text{abs}((\text{Median} - \text{MAM})/\text{MAM} \times 100)$ .

## Supplementary tables

**Table 1.** Groundwater sampling points (n) with heavy metal analyses in the raw dataset and the final, clean dataset after all quality controls and pre-treatments.

|                                | As        | Cd      | Cu      | Cr      | Ni        | Zn      |
|--------------------------------|-----------|---------|---------|---------|-----------|---------|
| Raw data [6] (n)               | 6472      | 363     | 295     | 255     | 6478      | 368     |
| Excluded (n, %)                | 120, 1.9% | 8, 2.2% | 6, 2.0% | 5, 2.0% | 120, 1.9% | 5, 1.4% |
| HOVER basis dataset (n = 6388) | 6352      | 355     | 289     | 250     | 6358      | 363     |

**Table 2.** Natural background levels of As, Cd, Cr, Cu, Ni, and Zn for the three main aquifer types in Denmark, based on HOVER basis, HOVER land-use, and BRIDGE modified; Abbreviations: NBL – natural background level, calculated as the 90th percentile; 95% CI – 95% confidence interval for the NBL; bold – the value is above the national TV, grey highlight – the 95% CI are not overlapping, so the difference in NBLs is significant.

| Element | Aquifer type        | BRIDGE modified       |             | HOVER basis           |             | HOVER land-use        |      |
|---------|---------------------|-----------------------|-------------|-----------------------|-------------|-----------------------|------|
|         |                     | NBL (95% CI) [µg/l]   | n           | NBL (95% CI) [µg/l]   | n           | NBL (95% CI) [µg/l]   | n    |
| As      | Carbonates          | 3.9 (3.6, 4.4)        | 1872        | 3.6 (3.3, 4.0)        | 2239        | 3.9 (3.4, 4.4)        | 1830 |
|         | Pre-Quaternary sand | 2.5 (2.2, 3.1)        | 650         | 2.5 (2.2, 3.1)        | 665         | 2.5 (2.3, 3.1)        | 560  |
|         | Quaternary sand     | <b>8.4 (7.6, 9.0)</b> | 2816        | <b>7.5 (7.0, 8.1)</b> | 3368        | <b>7.7 (7.2, 8.4)</b> | 3049 |
| Cd      | Carbonates          | 0.024 (0.006, 0.051)  | 68          | 0.035 (0.020, 0.106)  | 80          | 0.026 (0.016, 0.090)  | 77   |
|         | Pre-Quaternary sand | 0.006 (0.006, 0.025)  | 53          | 0.006 (0.006, 0.020)  | 56          | 0.006 (0.006, 0.020)  | 56   |
|         | Quaternary sand     | 0.006 (0.006, 0.013)  | 159         | 0.013 (0.010, 0.022)  | 201         | 0.012 (0.009, 0.021)  | 197  |
| Cr      | Carbonates          | 0.194 (0.121, 0.716)  | 49          | 0.235 (0.149, 0.750)  | 58          | 0.178 (0.120, 0.447)  | 55   |
|         | Pre-Quaternary sand | 0.210 (0.060, 0.806)  | 30          | 0.190 (0.060, 0.791)  | 31          | 0.190 (0.060, 0.791)  | 31   |
|         | Quaternary sand     | 0.172 (0.145, 0.245)  | 129         | 0.210 (0.162, 0.304)  | 161         | 0.192 (0.160, 0.299)  | 155  |
| Cu      | Carbonates          | 0.89 (0.66, 1.67)     | 57          | 1.42 (0.90, 2.71)     | 69          | 1.34 (0.86, 2.74)     | 67   |
|         | Pre-Quaternary sand | 0.42 (0.33, 1.38)     | 35          | 0.42 (0.32, 1.34)     | 36          | 0.42 (0.32, 1.34)     | 36   |
|         | Quaternary sand     | 1.10 (0.70, 1.93)     | 147         | 1.12 (0.94, 1.83)     | 184         | 1.10 (0.80, 1.35)     | 182  |
| Ni      | Carbonates          | <b>4.7 (4.2, 5.4)</b> | <b>1876</b> | <b>6.3 (5.5, 7.2)</b> | <b>2245</b> | 5.3 (4.8, 6.2)        | 1856 |
|         | Pre-Quaternary sand | 1.4 (1.1, 2.0)        | 650         | 1.4 (1.2, 2.0)        | 665         | 1.4 (1.2, 2.0)        | 565  |
|         | Quaternary sand     | <b>1.5 (1.4, 1.7)</b> | <b>2816</b> | <b>2.0 (1.8, 2.2)</b> | <b>3368</b> | 1.9 (1.7, 2.1)        | 3057 |
| Zn      | Carbonates          | 12.0 (7.4, 20.8)      | 70          | 21.8 (16.0, 34.9)     | 87          | 19.6 (9.8, 31.0)      | 85   |
|         | Pre-Quaternary sand | 4.2 (2.7, 39.2)       | 53          | 5.9 (2.8, 43.4)       | 56          | 5.9 (2.8, 43.4)       | 56   |
|         | Quaternary sand     | 9.7 (5.5, 14.4)       | 160         | 8.6 (6.5, 12.0)       | 202         | 8.2 (6.4, 12.0)       | 200  |

**Table 3.** Natural background levels of As for the three main aquifer types and different pH and redox conditions, based on HOVER basis, HOVER land-use, and BRIDGE modified; Abbreviations: NBL – natural background level, calculated as the 90th percentile; 95% CI – 95% confidence interval for the NBL; bold – the value is above the national TV, all 95% CI are overlapping, so the difference in NBLs is not significant.

| Aquifer type        | Redox & pH type   | BRIDGE modified         |      | HOVER basis             |      | HOVER land-use          |      |
|---------------------|-------------------|-------------------------|------|-------------------------|------|-------------------------|------|
|                     |                   | NBL (95% CI) [µg As/l]  | n    | NBL (95% CI) [µg As/l]  | n    | NBL (95% CI) [µg As/l]  | n    |
| Carbonate           | Anoxic & Neutral  | -                       | -    | 2.5 (2.2, 4.4)          | 84   | 2.7 (2.2, 4.6)          | 65   |
|                     | Mixed & Basic     | 3.3 (2.7, 5.8)          | 111  | 3.3 (2.6, 5.7)          | 115  | 3.3 (2.3, 5.8)          | 97   |
|                     | Mixed & Neutral   | <b>6.0 (2.6, 11.0)</b>  | 154  | <b>5.8 (2.5, 11.3)</b>  | 175  | <b>7.7 (3.1, 12.9)</b>  | 141  |
|                     | Oxic & Basic      | -                       | -    | 2.3 (2.1, 3.8)          | 108  | 2.2 (2.1, 3.3)          | 100  |
|                     | Oxic & Neutral    | -                       | -    | 2.1 (1.8, 2.8)          | 132  | 2.0 (1.8, 2.8)          | 114  |
|                     | Reduced & Basic   | 4.0 (3.4, 4.8)          | 225  | 3.9 (3.3, 4.7)          | 230  | 4.0 (3.5, 4.9)          | 204  |
|                     | Reduced & Neutral | 4.4 (3.8, 5.4)          | 1031 | 4.3 (3.8, 5.3)          | 1103 | 4.7 (4.1, 5.8)          | 886  |
| Pre-Quaternary sand | Reduced & Acidic  | 1.4 (1.0, 2.4)          | 115  | 1.4 (1.0, 2.5)          | 118  | 1.5 (1.0, 3.1)          | 98   |
|                     | Reduced & Basic   | 1.9 (1.5, 2.9)          | 136  | 1.9 (1.4, 2.8)          | 138  | 1.9 (1.5, 2.8)          | 119  |
|                     | Reduced & Neutral | 3.5 (2.5, 4.7)          | 309  | 3.5 (2.7, 4.8)          | 312  | 3.2 (2.6, 4.4)          | 262  |
| Quaternary sand     | Anoxic & Basic    | -                       | -    | 2.9 (2.0, 4.8)          | 50   | -                       | -    |
|                     | Mixed & Basic     | 3.9 (2.8, 5.2)          | 129  | 3.5 (2.6, 4.5)          | 164  | 3.6 (2.6, 4.7)          | 148  |
|                     | Mixed & Neutral   | 4.1 (3.6, 7.2)          | 114  | 4.0 (3.5, 5.2)          | 168  | 3.9 (3.1, 5.3)          | 151  |
|                     | Oxic & Basic      | -                       | -    | 2.4 (2.0, 2.5)          | 79   | 2.3 (2.0, 2.6)          | 73   |
|                     | Oxic & Neutral    | -                       | -    | 1.2 (0.9, 1.4)          | 83   | 1.3 (0.9, 1.3)          | 75   |
|                     | Reduced & Acidic  | 3.2 (3.0, 6.0)          | 65   | 3.3 (3.0, 4.9)          | 73   | 3.3 (3.0, 5.3)          | 69   |
|                     | Reduced & Basic   | <b>6.1 (5.5, 7.3)</b>   | 760  | <b>6.2 (5.6, 7.3)</b>   | 799  | <b>6.0 (5.3, 7.1)</b>   | 718  |
|                     | Reduced & Neutral | <b>10.9 (9.6, 11.0)</b> | 1334 | <b>10.0 (9.4, 11.0)</b> | 1460 | <b>11.0 (9.6, 11.2)</b> | 1335 |

**Table 4.** Natural background levels of **Ni** for the three main aquifer types and different pH and redox conditions, based on HOVER basis, HOVER land-use, and BRIDGE modified; Abbreviations: NBL – natural background level, calculated as the 90th percentile; 95% CI – 95% confidence interval for the NBL; bold – the value is above the national TV, all 95% CI are overlapping, so the difference in NBLs is not significant.

| Aquifer type        | Redox & pH type   | BRIDGE modified                     |      | HOVER basis                         |      | HOVER land-use                      |      |
|---------------------|-------------------|-------------------------------------|------|-------------------------------------|------|-------------------------------------|------|
|                     |                   | NBL (95% CI) [ $\mu\text{g Ni/l}$ ] | n    | NBL (95% CI) [ $\mu\text{g Ni/l}$ ] | n    | NBL (95% CI) [ $\mu\text{g Ni/l}$ ] | n    |
| Carbonate           | Anoxic & Neutral  | -                                   | -    | <b>21.7 (18.0, 32.1)</b>            | 84   | <b>20.0 (15.0, 26.0)</b>            | 65   |
|                     | Mixed & Basic     | 2.5 (2.2, 4.4)                      | 111  | 2.8 (2.2, 5.5)                      | 115  | 3.2 (2.2, 5.8)                      | 97   |
|                     | Mixed & Neutral   | 7.1 (4.5, 9.0)                      | 154  | 7.8 (6.1, 9.6)                      | 175  | 7.7 (4.5, 11.0)                     | 141  |
|                     | Oxic & Basic      | -                                   | -    | 4.4 (3.4, 8.8)                      | 108  | 4.0 (3.4, 8.0)                      | 100  |
|                     | Oxic & Neutral    | -                                   | -    | <b>12.5 (11.0, 15.8)</b>            | 132  | <b>12.0 (10.0, 15.5)</b>            | 114  |
|                     | Reduced & Basic   | 2.0 (1.6, 2.8)                      | 225  | 2.0 (1.6, 2.7)                      | 230  | 2.1 (1.6, 2.9)                      | 204  |
|                     | Reduced & Neutral | 3.1 (2.8, 3.9)                      | 1032 | 3.5 (3.0, 4.4)                      | 1104 | 3.0 (2.6, 3.5)                      | 903  |
| Pre-Quaternary sand | Reduced & Acidic  | 3.6 (2.0, 8.8)                      | 115  | 3.5 (2.0, 5.4)                      | 118  | 3.5 (2.0, 9.8)                      | 98   |
|                     | Reduced & Basic   | 0.8 (0.6, 1.3)                      | 136  | 0.8 (0.6, 1.2)                      | 138  | 0.6 (0.6, 1.3)                      | 121  |
|                     | Reduced & Neutral | 1.0 (0.7, 1.3)                      | 309  | 1.0 (0.7, 1.3)                      | 312  | 1.1 (0.8, 1.5)                      | 264  |
| Quaternary sand     | Anoxic & Basic    | -                                   | -    | 2.3 (1.1, 4.0)                      | 50   | -                                   | -    |
|                     | Mixed & Basic     | 1.2 (1.0, 1.8)                      | 129  | 1.4 (1.1, 1.7)                      | 164  | 1.4 (1.2, 1.8)                      | 151  |
|                     | Mixed & Neutral   | 2.8 (2.4, 4.5)                      | 114  | 3.4 (2.9, 4.5)                      | 168  | 3.8 (3.0, 4.5)                      | 151  |
|                     | Oxic & Basic      | -                                   | -    | 1.3 (0.9, 3.4)                      | 79   | 1.3 (1.0, 3.4)                      | 73   |
|                     | Oxic & Neutral    | -                                   | -    | 2.3 (1.9, 4.5)                      | 83   | 2.3 (1.8, 4.1)                      | 75   |
|                     | Reduced & Acidic  | 5.8 (3.9, <b>19.3</b> )             | 65   | 5.9 (4.2, <b>18.8</b> )             | 73   | 5.8 (4.1, <b>18.5</b> )             | 69   |
|                     | Reduced & Basic   | 1.0 (0.9, 1.1)                      | 761  | 1.0 (0.9, 1.2)                      | 800  | 1.0 (0.9, 1.2)                      | 721  |
|                     | Reduced & Neutral | 1.4 (1.2, 1.6)                      | 1334 | 1.4 (1.3, 1.6)                      | 1460 | 1.4 (1.2, 1.6)                      | 1337 |

**Table 5.** Natural background levels for the three main aquifer types at different locations in Denmark, based on HOVER basis and MP3 basis; Abbreviations: NBL – natural background level, calculated as the 90th percentile; 95% CI – 95% confidence interval for the NBL.

| Element | Aquifer type        | Location | HOVER basis                 |      | MP3 basis                   |      |
|---------|---------------------|----------|-----------------------------|------|-----------------------------|------|
|         |                     |          | NBL                         | n    | NBL                         | n    |
| As      | Carbonate           | Fyn      | <b>6.3 (5.4, 6.8)</b>       | 72   | <b>5.9 (3.9, 6.5)</b>       | 73   |
|         |                     | Jylland  | 3.4 (3.1, 3.8)              | 672  | 3.1 (2.6, 3.5)              | 484  |
|         |                     | Sjælland | 3.7 (3.2, 4.1)              | 1495 | 4.5 (4.0, 5.7)              | 1281 |
|         | Pre-Quaternary sand | Jylland  | 2.5 (2.2, 3.1)              | 665  | 3.0 (2.6, 3.5)              | 534  |
|         |                     | Fyn      | <b>11.0 (10.4, 12.6)</b>    | 524  | <b>11.0 (10.3, 11.7)</b>    | 545  |
|         | Quaternary sand     | Jylland  | <b>5.3 (5.0, 5.9)</b>       | 2141 | <b>5.0 (4.5, 5.5)</b>       | 1856 |
|         |                     | Sjælland | <b>9.5 (8.3, 11.7)</b>      | 668  | <b>9.5 (8.1, 11.4)</b>      | 764  |
| Cd      | Carbonate           | Jylland  |                             |      | 0.033 (0.029, 0.044)        | 141  |
|         |                     | Sjælland | 0.039 (-0.008, 0.110)       | 62   | 0.045 (0.028, 0.065)        | 165  |
|         | Pre-Quaternary sand | Jylland  | <b>0.006 (0.006, 0.020)</b> | 56   | <b>0.106 (0.034, 0.184)</b> | 186  |
|         |                     | Fyn      |                             |      | 0.043 (0.026, 0.063)        | 143  |
|         | Quaternary sand     | Jylland  | <b>0.013 (0.009, 0.021)</b> | 162  | <b>0.175 (0.141, 0.238)</b> | 716  |
|         |                     | Sjælland |                             |      | 0.038 (0.030, 0.050)        | 230  |
| Cr      | Carbonate           | Jylland  |                             |      | 0.929 (0.532, 1.236)        | 55   |
|         |                     | Sjælland | 0.220 (0.119, 0.750)        | 51   | 0.536 (0.343, 0.882)        | 118  |
|         | Pre-Quaternary sand | Jylland  | 0.190 (0.060, 0.791)        | 31   | 0.907 (0.706, 1.548)        | 88   |
|         |                     | Fyn      |                             |      | 0.555 (0.371, 5.049)        | 76   |
|         | Quaternary sand     | Jylland  | <b>0.180 (0.157, 0.369)</b> | 124  | <b>0.880 (0.816, 1.100)</b> | 392  |
|         |                     | Sjælland |                             |      | 1.100 (0.977, 1.300)        | 145  |
| Cu      | Carbonate           | Jylland  |                             |      | 1.24 (0.97, 2.22)           | 94   |
|         |                     | Sjælland | 1.46 (0.88, 3.19)           | 55   | 2.25 (1.68, 4.56)           | 152  |
|         | Pre-Quaternary sand | Jylland  | <b>0.42 (0.32, 1.34)</b>    | 36   | 1.16 (0.95, 1.93)           | 145  |
|         |                     | Fyn      | <b>0.77 (0.53, 1.34)</b>    | 37   | <b>2.22 (1.61, 4.50)</b>    | 124  |
|         | Quaternary sand     | Jylland  | <b>1.10 (0.95, 1.93)</b>    | 135  | <b>3.96 (3.07, 5.48)</b>    | 617  |
|         |                     | Sjælland |                             |      | 7.00 (4.14, 15.52)          | 227  |
| Ni      | Carbonate           | Fyn      | 0.8 (0.7, 1.7)              | 72   | 1.0 (0.9, 2.8)              | 73   |

| Element | Aquifer type        | Location | HOVER basis            |      | MP3 basis                |            |
|---------|---------------------|----------|------------------------|------|--------------------------|------------|
|         |                     |          | NBL                    | n    | NBL                      | n          |
| Zn      | Pre-Quaternary sand | Jylland  | 5.5 (4.9, 5.9)         | 672  | 5.3 (4.7, 6.3)           | 484        |
|         |                     | Sjælland | 7.4 (6.4, 8.4)         | 1501 | 8.3 (7.2, <b>10.8</b> )  | 1282       |
|         |                     | Jylland  | <b>1.4 (1.2, 2.0)</b>  | 665  | <b>3.2 (2.7, 4.9)</b>    | <b>534</b> |
|         |                     | Fyn      | 1.6 (1.4, 2.0)         | 524  | 2.0 (1.8, 2.5)           | 545        |
|         | Quaternary sand     | Jylland  | <b>1.8 (1.5, 2.0)</b>  | 2141 | <b>4.0 (3.5, 4.6)</b>    | 1856       |
|         |                     | Sjælland | 2.6 (2.4, 2.9)         | 668  | 3.2 (2.9, 3.7)           | 764        |
|         | Carbonate           | Jylland  |                        |      | 16.7 (11.6, 35.7)        | 121        |
|         |                     | Sjælland | 26.0 (17.1, 42.6)      | 62   | 36.7 (26.4, 46.2)        | 167        |
|         | Pre-Quaternary sand | Jylland  | 5.9 (2.8, 43.4)        | 56   | 28.0 (17.0, 39.5)        | 191        |
|         |                     | Fyn      |                        |      | 13.6 (12.0, 21.6)        | 163        |
|         | Quaternary sand     | Jylland  | <b>8.1 (6.3, 12.7)</b> | 161  | <b>30.3 (25.4, 38.7)</b> | 720        |
|         |                     | Sjælland |                        |      | 35.9 (26.9, 45.1)        | 234        |

bold – the value is above the national TV, grey highlight – the 95% CI are not overlapping, so the difference in NBLs is significant

## References

1. Thorling, L.; Sørensen, B. Grundvandets Kemiske Tilstandsvurdering Vandområdeplan 2015-2021 - Data Og Metodevalg: Kemisk Tilstand Af Danske Grundvandsforekomster, Samlet Rapportering; GEUS: København, 2014; p. 59;.
2. Hansen, M.; Pjetursson, B. Free, Online Danish Shallow Geological Data. *GEUS Bulletin* **1969**, 23, 53–56, doi:10.34194/geusb.v23.4842.
3. Hinsby, K.; Condesso de Melo, M.T.; Dahl, M. European Case Studies Supporting the Derivation of Natural Background Levels and Groundwater Threshold Values for the Protection of Dependent Ecosystems and Human Health. *Science of The Total Environment* **2008**, 401, 1–20, doi:10.1016/j.scitotenv.2008.03.018.
4. Frei, R.; Frei, K.M.; Kristiansen, S.M.; Jessen, S.; Schullehner, J.; Hansen, B. The Link between Surface Water and Groundwater-Based Drinking Water – Strontium Isotope Spatial Distribution Patterns and Their Relationships to Danish Sediments. *Applied Geochemistry* **2020**, 121, 104698, doi:10.1016/j.apgeochem.2020.104698.
5. Sandersen, P.B.E.; Jørgensen, F. Buried Tunnel Valleys in Denmark and Their Impact on the Geological Architecture of the Subsurface. *GEUS Bulletin* **2017**, 13–16, doi:10.34194/geusb.v38.4388.
6. Thorling, L.; Ditlefsen, C.; Ernsten, V.; Hansen, B.; Johnsen, A.R.; Trolborg, L. Grundvandovervågning. Status og udvikling 1989 – 2018; GEUS: Copenhagen, 2019;
